# Supplementary material for: SHANK3 Co-ordinately Regulates Autophagy and Apoptosis in Myocardial Infarction
Source: Front Physiol. 2020 Aug 25;11:1082. doi: 10.3389/fphys.2020.01082 (PMC7477314; doi:10.3389/fphys.2020.01082)
Supplement: Supplementary file 1 [file Table_1.XLSX]

## Sheet: wt(MI)
FS	DD	DEV	SD	SEV		EF	HR	SBP	DBP
24.0236	4.9871	117.535	3.78902	61.5257		47.6534	580	117	97
24.1392	5.00865	118.719	3.7996	61.9367		47.8292	650	136	93
25.5668	5.54139	149.988	4.12463	75.283		49.8073	516	133	87
19.8406	5.93311	175.444	4.75595	105.231		40.0203	675	119	103
25.0443	5.86689	170.994	4.39757	87.5756		48.7843	386	134	105
21.8688	4.44482	89.8046	3.47279	49.9217		44.4108	483	113	81
29.5684	6.83378	241.937	4.81314	108.208		55.2742	458	116	86
25.3479	3.78412	61.336	2.82493	30.2023		50.7593	443	121	99

## Sheet: shank3--(MI)
FS	DD	DEV	SD	SEV		EF	HR	SBP	DBP
13.8373	5.99546	179.689	5.16585	127.546		29.0185	373	118	81
19.0563	6.69595	231.039	5.41994	142.521		38.3131	374	115	90
13.2931	5.4518	144.46	4.72709	103.745		28.1846	454	114	94
18.1889	7.36351	286.251	6.02417	181.661		36.5377	453	116	103
12.5564	5.1973	129.352	4.5447	94.6152		26.8542	677	120	103
11.5469	5.3786	140.025	4.75754	105.313		24.7898	660	116	89
11.5781	5.87936	171.827	5.19864	129.429		24.6749	421	124	94

## Sheet: NTg(MI)
FS	DD	DEV	SD	SEV		EF	HR	SBP	DBP
24.0667	6.09865	186.831	4.63091	98.8746		47.0781	617	140	101
27.1392	5.50865	147.955	4.01364	70.5683		52.3044	589	116	101
24.5668	5.54139	149.988	4.18004	77.6983		48.197	373	113	98
29.8406	5.93311	175.444	4.16264	76.9352		56.1482	511	128	97
24.0443	4.86689	111.046	3.69668	58.0017		47.768	466	127	82
23.8688	4.34482	85.1222	3.30776	44.3849		47.8575	585	145	88
21.5684	3.93378	67.277	3.08533	37.48		44.2899	626	135	85
22.3479	4.73457	104.129	3.67649	57.2461		45.0238	498	140	89

## Sheet: Tgshank3(MI)
FS	DD	DEV	SD	SEV		EF	HR	SBP	DBP
31.046	4.3786	86.689	3.01922	35.5505		58.9908	525	136	83
25.8277	4.53649	94.2144	3.36482	46.259		50.9003	616	121	94
21.6546	4.56486	95.6022	3.57636	53.5777		43.9577	477	115	97
27.5086	4.62545	98.602	3.35305	45.8691		53.4805	630	144	82
25.6088	4.71993	103.378	3.51121	51.2617		50.4135	502	126	82
29.218	5.60338	153.877	3.96618	68.602		55.4177	486	140	100
26.5476	4.81306	108.204	3.53531	52.1119		51.8391	467	130	104

## Sheet: wt(sham)
FS	DD	DEV	SD	SEV		EF	HR	SBP	DBP
40.324	3.20608	41.1493	1.91326	11.3662		72.3782	533	136	88
41.613	3.30608	44.3303	1.93032	11.627		73.7719	619	115	104
42.7505	3.97297	68.8815	2.27451	17.6207		74.4188	598	141	95
41.9921	3.36194	46.1634	1.95019	11.9349		74.1463	450	120	94
42.142	2.93987	33.3081	1.70095	8.40015		74.7805	618	114	97

## Sheet: shank3--(sham)
FS	DD	DEV	SD	SEV		EF	HR	SBP	DBP
40.5361	3.00608	35.1737	1.78753	9.54777		72.8553	516	113	94
39.394	3.10578	38.0883	1.88229	10.9014		71.3787	432	125	97
41.051	3.0814	37.3638	1.81645	9.95001		73.3699	665	118	105
41.4563	3.97297	68.8815	2.32593	18.638		72.942	588	115	96

## Sheet: NTg(sham)
FS	DD	DEV	SD	SEV		EF	HR	SBP	DBP
42.236	3.20608	41.1493	1.85196	10.4569		74.5878	399	127	105
39.613	2.90608	32.3778	1.7549	9.10525		71.8781	528	123	91
39.7505	2.97297	34.2339	1.7912	9.59825		71.9627	566	132	89
40.9921	3.36194	46.1634	1.98381	12.4665		72.9948	543	120	92
41.142	2.93987	33.3081	1.73035	8.78033		73.639	441	128	86

## Sheet: Tgshank3(sham)
FS	DD	DEV	SD	SEV		EF	HR	SBP	DBP
42.6054	3.39189	47.1632	1.94676	11.8815		74.8077	472	129	87
41.823	3.83987	63.5142	2.23392	16.8404		73.4857	654	125	90
39.3162	3.16822	39.9786	1.9226	11.5085		71.2135	620	137	103
40.2641	2.90676	32.3963	1.73638	8.85953		72.6526	558	146	91
